# Supplementary material for: Laboratory Measurements of the Performances of the Sweeping Langmuir Probe Instrument Aboard the PICASSO CubeSat
Source: Copernicus journal article supplement (doi:10.5194/gi-2022-7), 2022-05-12

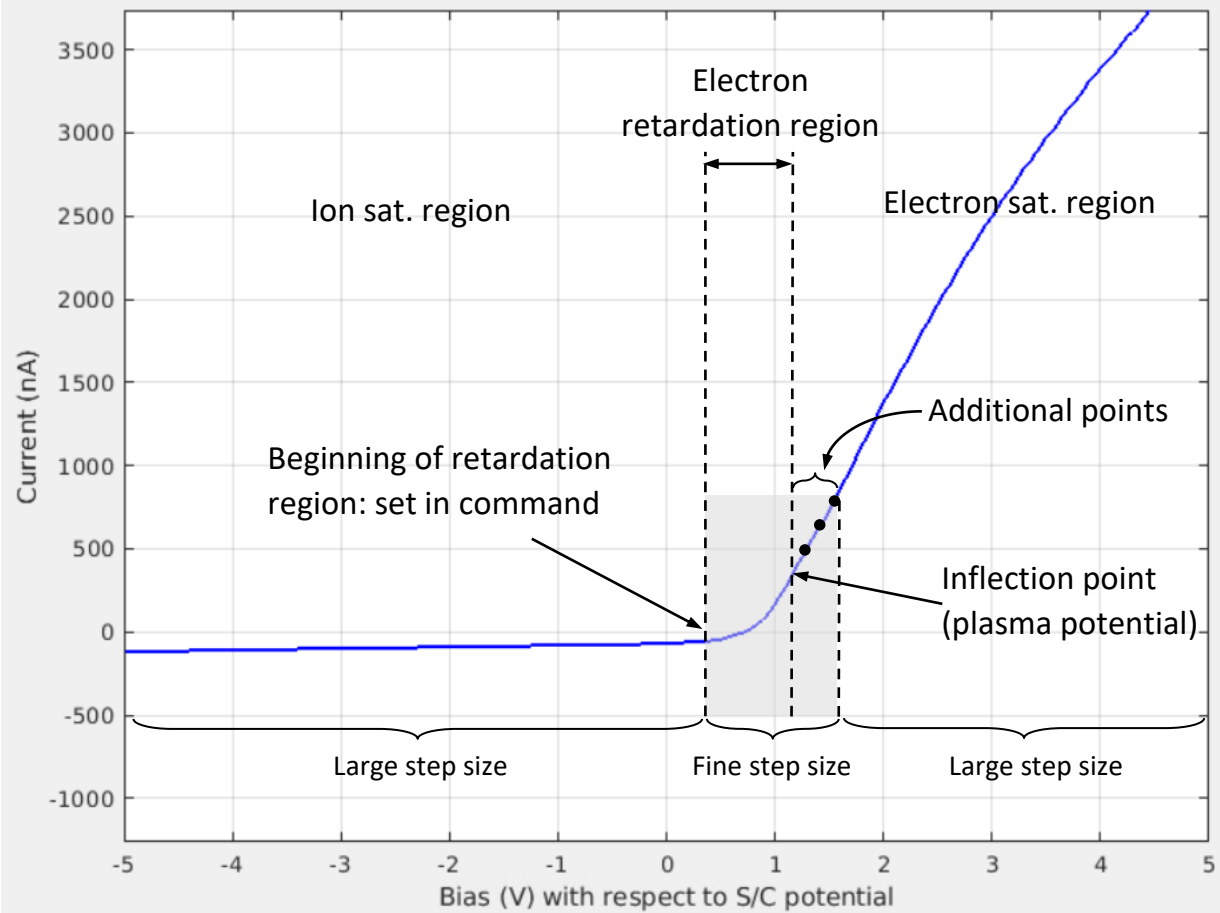

Supplement: Supplementary file [file gi-2022-7-AC1-supplement.pdf]
